# Supplementary material
Source: publisher site journal article supplement (https://www.dovepress.com/article/571741)
Supplement: Supplementary file 1 [file 571741%20Supplementary%20Material.docx]

**Table S1: Sex hormones concentrations between Hypo et Eugonadal participants**

| **Variables** | **Participant group** | | ***P*-value** |
| --- | --- | --- | --- |
| **Low (n=12)** | **Control (n=16)** |
| **Estradiol (pmol/L)** | 81.4 **± 43.1** | **115.1 ± 28.2** | **0.03** |
| Hormone-binding globulin (nmol/L) | 28.1 ± 11.3 | 32.1 ± 13.1 | 0.43 |
| DHEA (µmol/L) | 3.9 ± 2.5 | 4.6 ± 1.8 | 0.16 |
| Follicle-stimulating hormone (UI/L) | 14.1 ± 20.6 | 4.8 ± 2.7 | 0.16 |
| Luteinizing hormone (UI/L) | 9.4 ± 10.5 | 4.6 ± 1.8 | 0.42 |
| Cortisol (nmol/L) | 297.2 ± 88.8 | 303.7 ± 148.1 | 0.42 |

**Abbreviations:** DHEA, dehydroepiandrosterone sulphate. Data are expressed as means ± sd.

**Table S2: Correlation analysis between pain perception and modulation outcomes and total and bioavailable testosterone concentration.**

|  | HPT | HPTol | TSP | CPM |
| --- | --- | --- | --- | --- |
| Total Testosterone | r = 0.21, p = 0.28 | r = 0.38, p = 0.05 | r = -0.02, p = 0.89 | r = -0.23, p = 0.22 |
| Bioavailable Testosterone | r = 0.38, p = 0.05 | r = 0.41, p = 0.03 | r = 0.02, p = 0.90 | r = -0.16, p = 0.42 |

**Abbreviations:** HPT, Heat Pain Threshold; HPTol, Heat Pain Tolerance; TSP, Temporal Summation of Pain, CPM, Conditioned Pain Modulation.

**Table S3: Correlation analysis between pain perception and modulation outcomes and estradiol concentration.**

|  | HPT | HPTol | TSP | CPM |
| --- | --- | --- | --- | --- |
| Estradiol concentration | r = 0.04, p = 0.84 | r = 0.03, p = 0.85 | r = 0.25, p = 0.20 | r = -0.09, p = 0.63 |

**Abbreviations:** HPT, Heat Pain Threshold; HPTol, Heat Pain Tolerance; TSP, Temporal Summation of Pain, CPM, Conditioned Pain Modulation.
